# Supplementary material for: How do non-covalent complexes dissociate in droplets? A case study of the desolvation of dsDNA from a charged aqueous nanodrop
Source: Royal Society of Chemistry journal article supplement (doi:10.1039/c5cp04331j), 2015-01-01
Supplement: c5cp04331j4.pdf [file c5cp04331j4.pdf]

**Supporting information for:**

**How do non-Covalent Complexes Dissociate in  
Droplets? A case study of the Desolvation of dsDNA  
from a Charged Aqueous Nanodrop**

Mahmoud Sharawy<sup>†</sup> and Styliani Consta<sup>\*,†</sup>

*Department of Chemistry, The University of Western Ontario, London, Ontario, Canada N6A  
5B7, and Department of Chemistry, University of Cambridge, Lensfield Road, Cambridge, CB2  
1EW, United Kingdom*

E-mail: sc904@cam.ac.uk

---

\*To whom correspondence should be addressed

<sup>†</sup>Department of Chemistry, The University of Western Ontario, London, Ontario, Canada N6A 5B7

<sup>‡</sup>Department of Chemistry, University of Cambridge, Lensfield Road, Cambridge, CB2 1EW, United Kingdom

## MD Movies

**Movie S1.** Denaturation of the 11-mer all A·T dsDNA in a  $-20 e$  charged aqueous droplet during desolvation. (150 ps)

File: [mov-dsDNA-denature-gas-phase-150ps.mpg](#)

**Movie S2.** Denaturation of the 11-mer all A·T DNA duplex in a  $-15 e$  charged aqueous droplet that contains 5  $\text{Na}^+$  ions during desolvation. (250 ps)

File: [mov-dsDNA-denature-5Na-gas-phase-250ps.mpg](#)

**Movie S3.** Ejection of a  $\text{Cl}^-$  from a droplet composed of 880  $\text{H}_2\text{O}$  molecules, the 11-mer all A·T dsDNA, 20  $\text{Na}^+$  ions, and 10  $\text{Cl}^-$  ions during desolvation into the gas phase. (150 ps)

File: [mov-dsDNA-denature-20Na-10Cl-Cl-ejection-150ps.mpg](#)

## Desolvated states of $[\text{dsDNA}]^{20-}$

In Fig. S1 typical snapshots of the desolvated states of  $[\text{dsDNA}]^{20-}$  at various ion concentrations are shown. In Fig. S1 (a) and (b) the  $[\text{dsDNA}]^{20-}$  denatures when the net charge is more negative than half of the charge of the  $[\text{dsDNA}]^{20-}$ . (c) The zipped-up double-stranded state of the DNA is formed when the net charge is exactly half that of the  $[\text{dsDNA}]^{20-}$ . (d)–(f) The compactness of the dsDNA increases when sodium chloride aggregates are formed on the dsDNA.

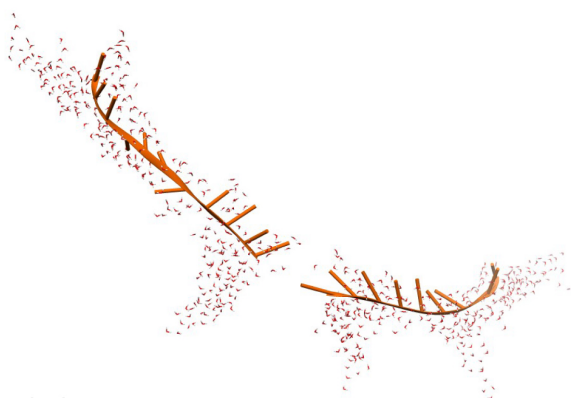

(a)  $[\text{ssDNA}]^{10-}$   $[\text{ssDNA}]^{10-}$

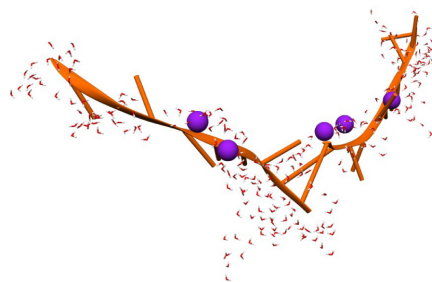

(b)  $[\text{ssDNA}+2\text{Na}^+]^{8-}$   $[\text{ssDNA}+2\text{Na}^+]^{7-}$

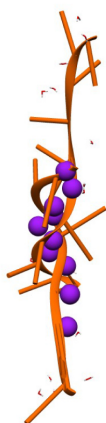

(c)  $[\text{dsDNA}+10\text{Na}^+]^{10-}$

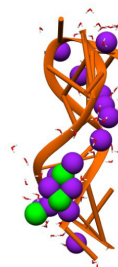

(d)  $[\text{dsDNA}+15\text{Na}^+ + 3\text{Cl}^-]^{8-}$

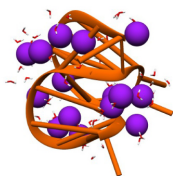

(e)  $[\text{dsDNA}+15\text{Na}^+]^{5-}$

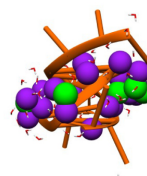

(f)  $[\text{dsDNA}+20\text{Na}^+ + 5\text{Cl}^-]^{5-}$

Figure S1: Typical snapshots of the final charge states of dsDNA in the the gas phase. The colour coding is:  $\text{Na}^+$  ions are shown by purple spheres and  $\text{Cl}^-$  ions by green spheres. Details are described in the text.

## Parameters of the simulations

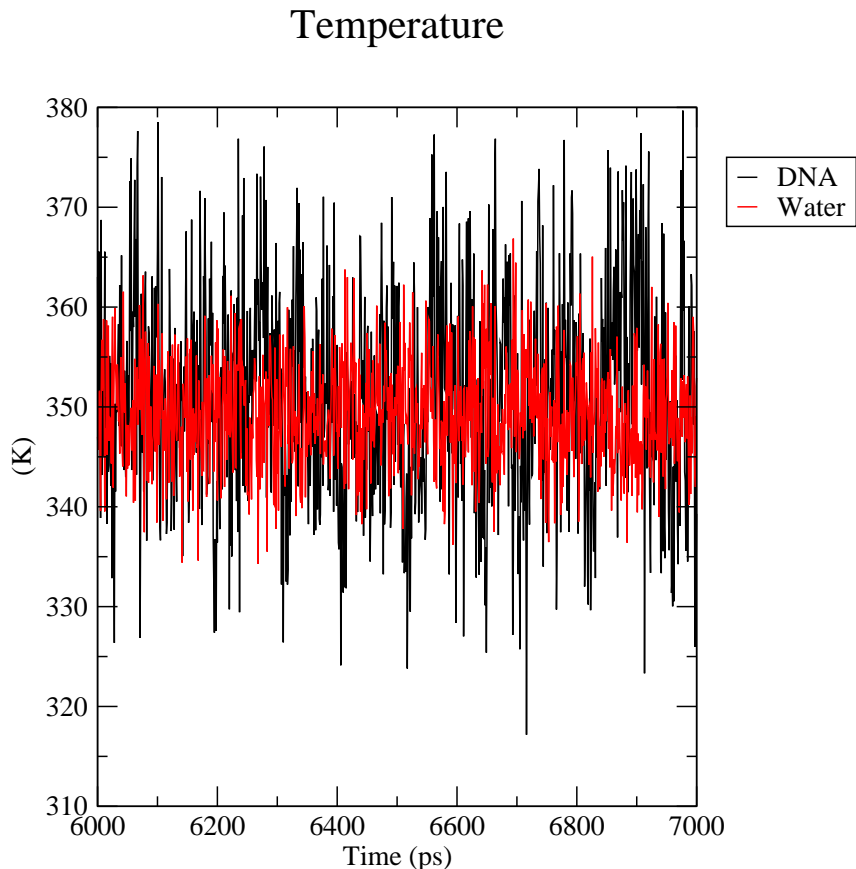

Figure S2: Temperature profile of water and DNA. The droplet comprised  $\sim 800$  TIP3P water molecules and a  $[\text{dsDNA}]^{20-}$ . The system was coupled to Nosé-Hoover thermostat at  $T = 350$  K.

A typical time step for simulations performed with empirical force fields is 1 fs. In our simulations, we use the time step of 0.5 fs, which is 13 times smaller than the fastest O–H vibration in the system. To confirm the choice of our time step we performed short simulations with a time step of 1 fs and we found similar results to that with 0.5 fs regarding the critical charge of the droplet as shown in Fig. S3 with respect to the charge state of the droplet. However, we cannot use 1 fs in our simulations because it is a large time step to resolve the motions in our system. Since, we have evaporation with molecules leaving the droplets in high speed, a larger time step than 0.5 fs may

render the integration algorithm unstable. We also tested the outcome of the fragmentation using the SPC/E model of water. The results are presented in Fig. S3.

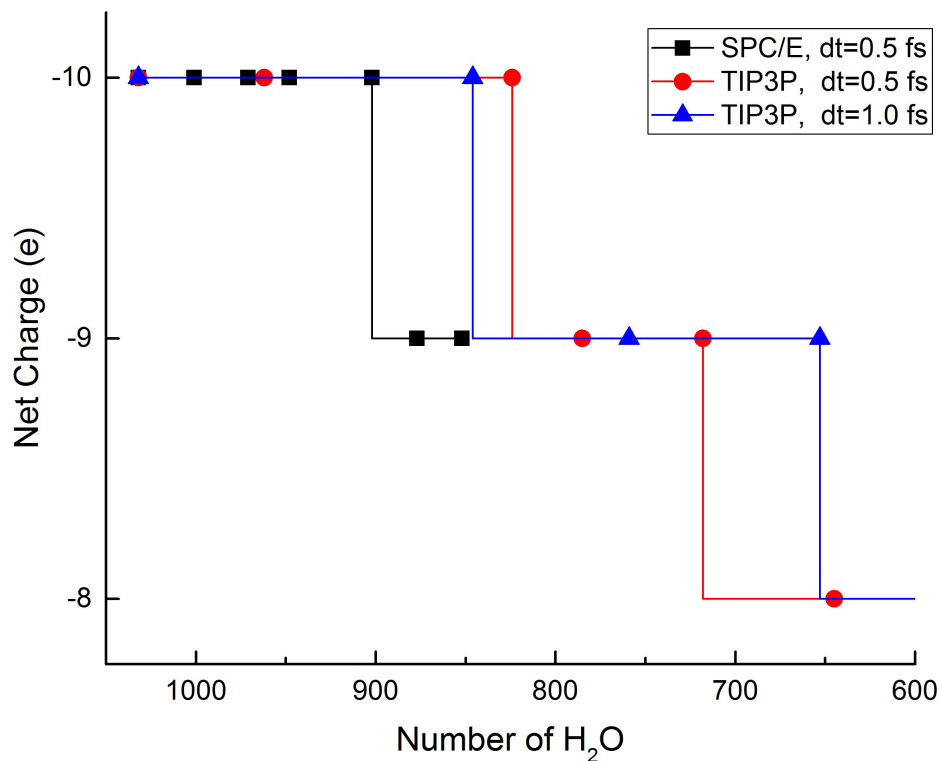

Figure S3: Critical charge of TIP3P and SPC/E water models. Each symbol indicates the net charge of the nanodrop prior to a single  $\text{Cl}^-$  ion evaporation. The change in the charge is illustrated by a vertical line from the data point followed by a horizontal line that indicates the water evaporation before reaching a new critical charge.
